# Supplementary material for: OsPLS4 Is Involved in Cuticular Wax Biosynthesis and Affects Leaf Senescence in Rice
Source: PubMed Central journal article supplement (PMC7300252; doi:10.3389/fpls.2020.00782), 2020-06-11
Supplement: Data_Sheet_1.pdf [file Data_Sheet_1.pdf]

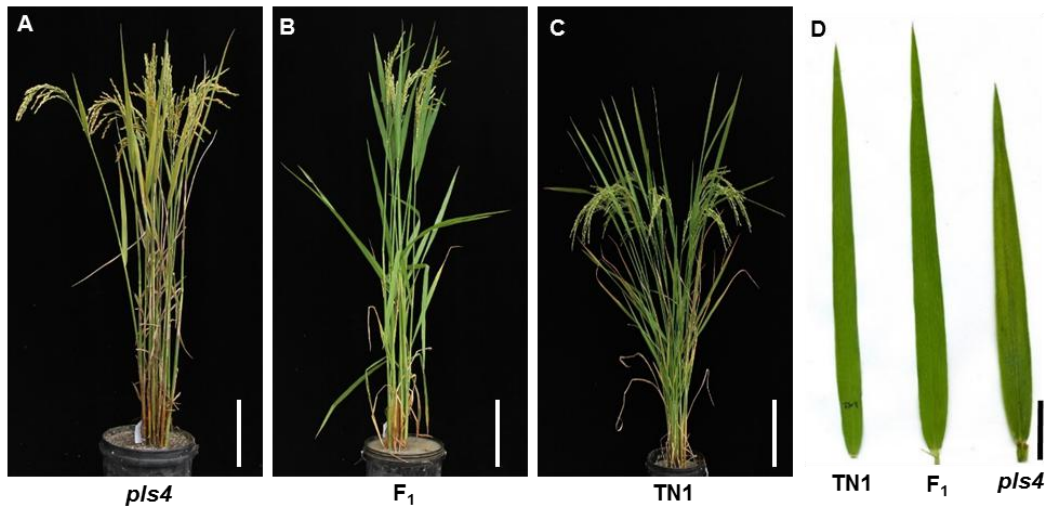

**Figure S1.** The *pls4* mutant, TN1 and F<sub>1</sub> phenotype.

(A-C) The plant phenotype. (D) Plants correspond to leaf phenotype. Bars: (A-C) 10 cm; (D) 1 cm.

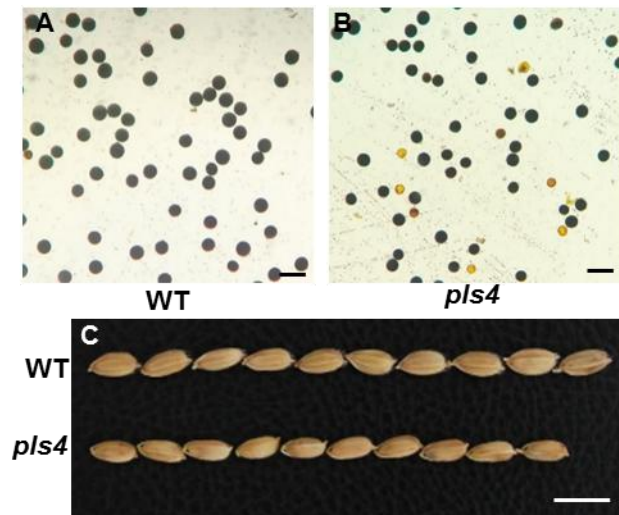

**Figure S2.** Pollen fertility analysis and grains size of WT and *pls4*.

(A-B) I<sub>2</sub>-KI staining of WT and *pls4* mature pollen grains. (C) The grains size of WT and *pls4*. Bars: (A, B) 1 mm; (C) 1 cm.

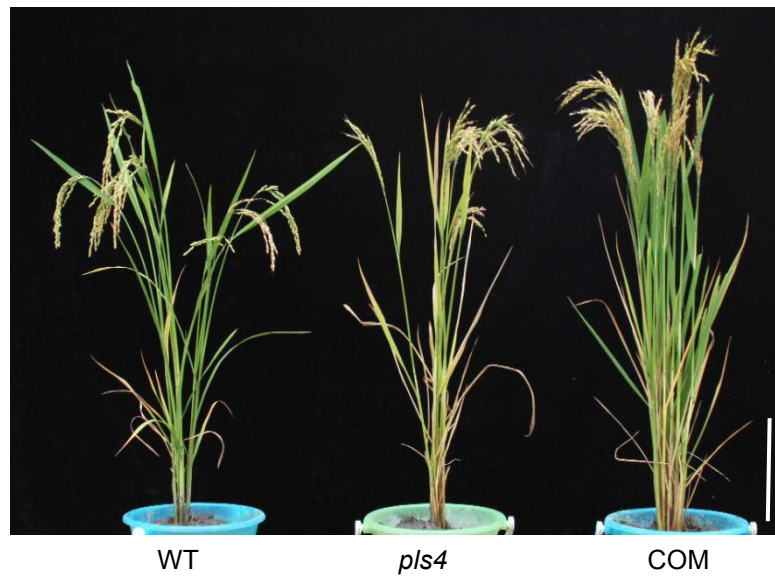

**Figure S3.** WT, *pls4* mutant and complementation plants. *OsPLS4*-complementation plants were developed by transforming the whole genomic fragment of *OsPLS4* into the *pls4* mutant. Bar=10 cm.

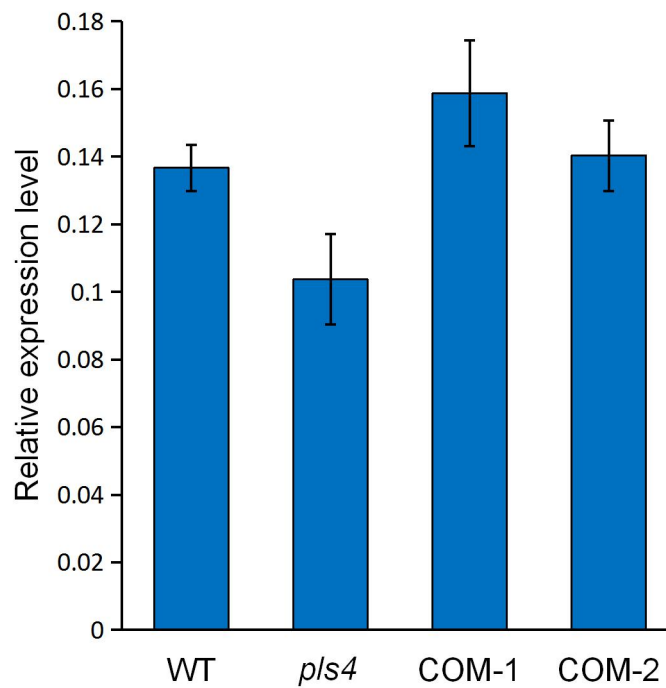

**Figure S4.** qPCR analysis of *PLS4* expression in the tillering leaves of WT, *pls4* and two COM independent lines. The data presented are the means±SDs of three biological replicates.

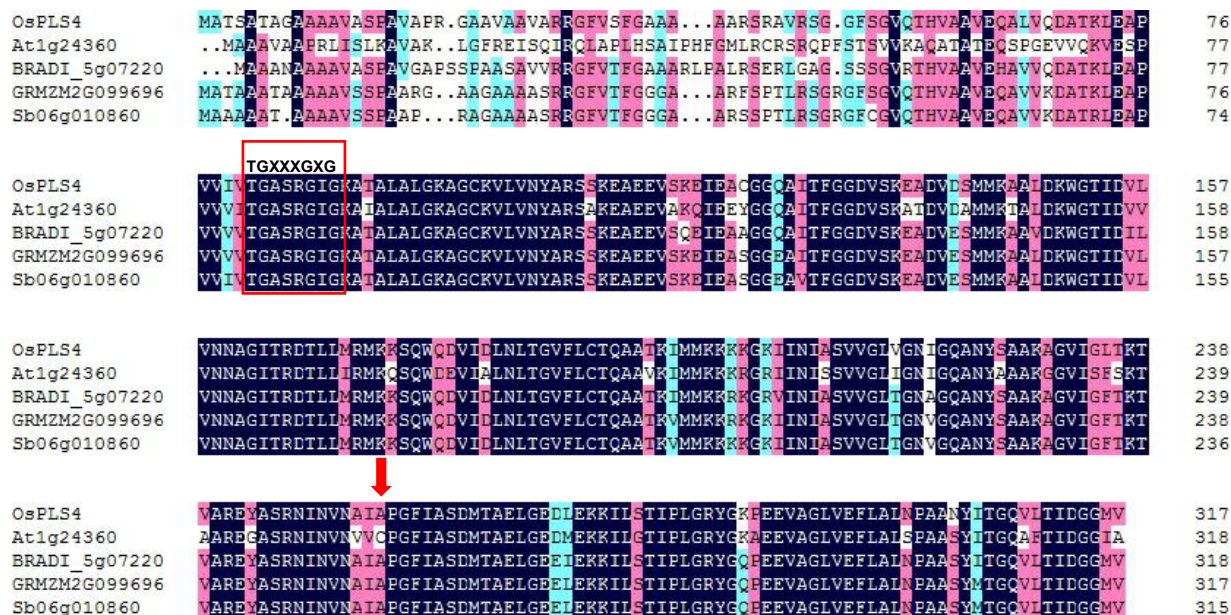

**Figure S5.** OsPLS4 protein sequence alignment of homologues.

Protein sequence alignment of *OsPLS4* and its homologues in sorghum, maize, Brachypodium and *Arabidopsis* according to Clustal W. Conserved amino acids are highlighted: white letters on a black background indicate amino acids that are conserved across all these samples. The arrowhead shows the mutant amino acid in the protein of the *pls4* mutant, Red box contains TGXXXGXG is classical-SDR NAD-binding motif.

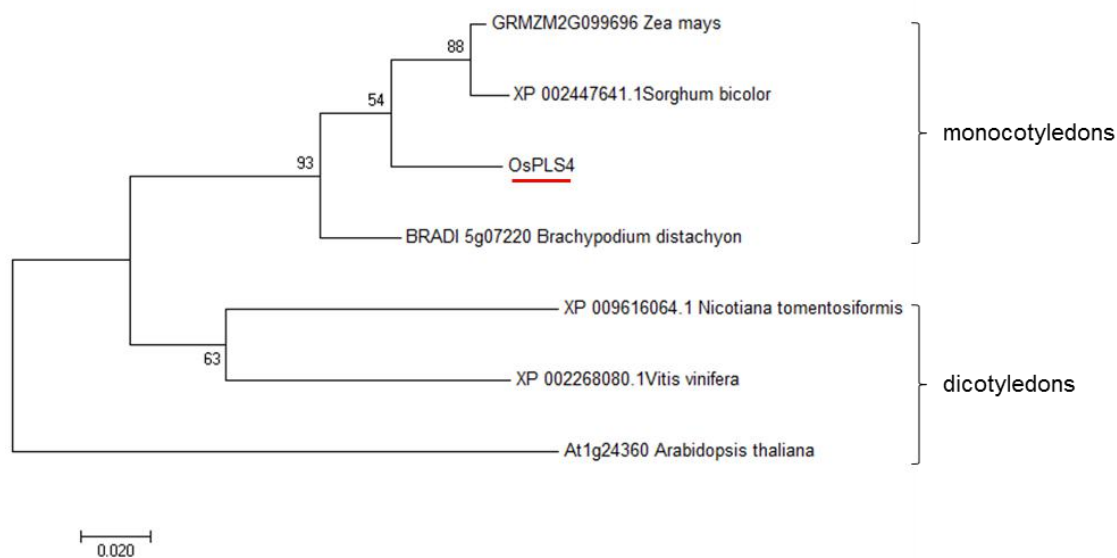

**Figure S6.** Phylogenetic tree analysis of OsPLS4 using the maximum likelihood method from MEGA7 software.

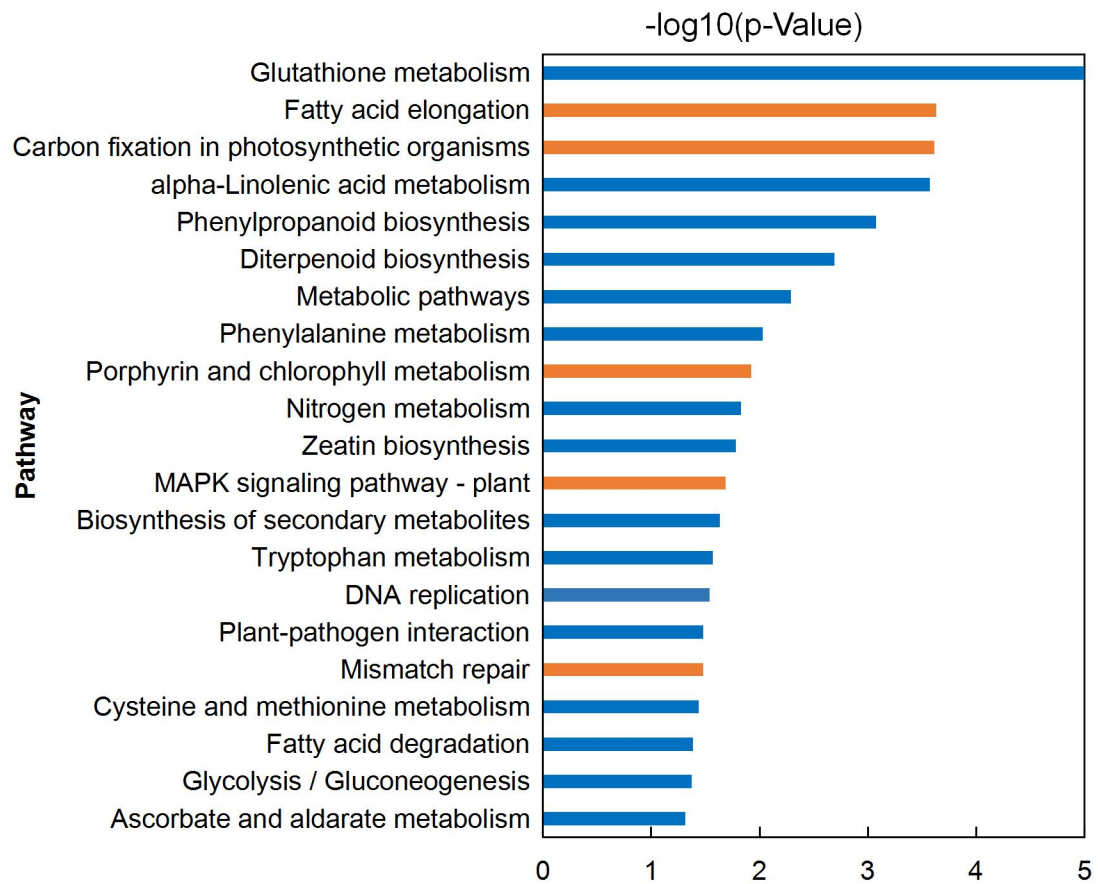

**Figure S7.** KEGG enrichment analysis shared between the WT and *pls4*. This figure illustrates the top 20 enriched pathways and P-value sequencing from small to large. Orange represents some of the biological pathways associated with this study.

**Table S1.** Genetic analysis of F<sub>2</sub> populations derived from crosses between *pls4* and other conventional varieties

| Combination       | F <sub>1</sub> |                 | F <sub>2</sub> |                 | $\chi^2$    | P-value     |
|-------------------|----------------|-----------------|----------------|-----------------|-------------|-------------|
|                   | Normal         | Leaf senescence | Normal         | Leaf senescence |             |             |
| <i>pls4</i> /Nip  | 10             | 0               | 363            | 112             | 0.534702773 | 0.47445614  |
| <i>Nip/pls4</i>   | 6              | 0               | 218            | 65              | 0.664425342 | 0.429902822 |
| <i>pls4</i> /TN1  | 9              | 0               | 286            | 87              | 0.588627854 | 0.454851356 |
| TN1/ <i>pls4</i>  | 8              | 0               | 267            | 76              | 1.620355896 | 0.224066686 |
| <i>pls4</i> /9311 | 8              | 0               | 245            | 69              | 1.691198191 | 0.215676424 |
| 9311/ <i>pls4</i> | 7              | 0               | 225            | 70              | 0.264452179 | 0.61410715  |

**Table S2. Primers.**

| <b>Reaction</b>          | <b>Primer name</b>                                | <b>Forward primer (5'-3')</b>                 | <b>Reverse prime (5'-3')</b>                          |                                                      |
|--------------------------|---------------------------------------------------|-----------------------------------------------|-------------------------------------------------------|------------------------------------------------------|
| Gene mapping             | M1                                                | TATGCGAAGGATGTGCGAC                           | ACGAATACATGTGCCTGCC                                   |                                                      |
|                          | M5                                                | CGGAGCTGGTCTAGCCATC                           | GTCTCCGTCTTCCTCACTCG                                  |                                                      |
|                          | M6                                                | AATGGGACCAGAAAGCACAC                          | AAAAAGAGCATGGGGGCTAC                                  |                                                      |
|                          | M3                                                | AACCGGCCATGCCAGAGAGG                          | CCAAATCCTATCCGCCACACACC                               |                                                      |
|                          | M2                                                | CTGGATCTGTGAGGTGTCTCTAGG                      | AAAGAGGAGTTCGCACAAGTGG                                |                                                      |
|                          | M4                                                | GTAGCCTTGCACTCGACCGTACC                       | ACCAACTCTGGCAATGCATCC                                 |                                                      |
|                          | C1                                                | CATTGCCAACCCGTAAAGCTACC                       | GGTGAGCTGAAGATGTTCTTTTCATGG                           |                                                      |
|                          | C2                                                | CCCTGCACCTGGATTCTCTCTCC                       | ATTGACGCACAGACAAGAACAAGACC                            |                                                      |
|                          | C3                                                | TTATTAGAGCGCCATGTGGC                          | CATGCTGTGGTTTGTCAAGG                                  |                                                      |
|                          | C4                                                | AGCAACTGCACAGGAATAAT                          | ATGTGCCACCATAAGTTGAT                                  |                                                      |
| Subcellular localization | PLS4-GFP                                          | GACAGCCAGATCAACTAGTATGGCGAC<br>CTCCGCGACCGCAG | GCCCTTGCTCACCATGGATCCCATCACCA<br>TCCCTCCATCG          |                                                      |
|                          | Construction of genetic<br>complementation vector | PLS4-COM                                      | GAGCTCGGTACCCGGGGATCCTGTATGC<br>CCAATAAAAACACTTTGG    | ACGACGGCCAGTGCCAAGCTTTACTTCC<br>TTCATGCATTCATCTCC    |
|                          | Over-expression                                   | PLS4-OE                                       | GAATTCATGGCGACCTCCGCGACCGCAG<br>GGGCAGCAG             | GAATTCCTACATCACCATCCCTCCATCGA<br>TGGTAAG             |
|                          | GUS reporting vector                              | PLS4-GUS                                      | GCTATGACCATGATTACGAATTCACCTTGT<br>TAATGATATTTCTTGGATT | CTAGAAATTTACCCTCAGATCTACCATGA<br>GTGCGCGTAGAGAAGACGC |
|                          | Gene expression analysis                          | <i>OsUBQ(Ubiquitin)</i>                       | ACCCTGGCTGACTACAACATC                                 | AGTTGACAGCCCTAGGGTG                                  |
|                          |                                                   | <i>OsActin</i>                                | TGGCATCTCTCAGCACATTCC                                 | TGCACAATGGATGGGTGACA                                 |
| <i>OsPLS4-rt</i>         |                                                   | CTCTGTACACAAGCTGCTACAA                        | ATTACCAACAAGACCAACAAC                                 |                                                      |
| <i>OsWR1</i>             |                                                   | AGAAGTCCCACATTGGCGTGT                         | GCTCAGCAACTCCTCGATCATT                                |                                                      |
| <i>OsCER7</i>            |                                                   | ACCACCATCTGTGGTTGAGGACAA                      | TTGGCGATATAGCTTCTGCGTCT                               |                                                      |
| <i>OsCER10</i>           |                                                   | CGAGTGGTAACGGTGGCTAT                          | CTGTGTGGCAATGTTGAACC                                  |                                                      |
| <i>OsFDH2</i>            |                                                   | TGTGAACAATGCTCGTGGAG                          | CCTGTCCAGCATGTCCTTTA                                  |                                                      |
| <i>OsKCS2</i>            |                                                   | GTACAGGTTTGGGAACACGTCG                        | GCTCAGTCGGTTGAAATCCTGG                                |                                                      |
| <i>OsMAH1</i>            |                                                   | ACCACGTCAAGTCGAAGCAGAAGA                      | AGTTCAACGGTGTGACTGTGAGGA                              |                                                      |
| <i>OsKCR1</i>            |                                                   | ACCCGCTCTACAGCTCTAC                           | TACAGGGGTACCTGGCATTG                                  |                                                      |
| <i>OsPAS2</i>            |                                                   | TGCATCCATCCTTTCTCTCGCCAT                      | CCTTTGCCAATGCCTTCTTCCGTT                              |                                                      |
| <i>OsWSL3</i>            |                                                   | CAATTCTCGAGATGCCTCTATGT                       | TCTTGATGGACGCCATCTTC                                  |                                                      |
| <i>OsCatB</i>            |                                                   | GCTTGCTTTCTGCCAGCGATAAT                       | AAATAGTTTGGGCCAAGACGGTGC                              |                                                      |
| <i>OsPOD1</i>            |                                                   | ACGTCGGGTGCGCAACAAC                           | CGAACTCGTCCACCGACGCC                                  |                                                      |
| <i>OsPOD2</i>            | AGGCTCAACTGCTCCAGGGTCA                            | TGGCAATAAACCGGACAAGCCCT                       |                                                       |                                                      |

|                |                           |                          |
|----------------|---------------------------|--------------------------|
| <i>OsAPX1</i>  | AGGTGCCACAAGGAAAGATCTGGT  | TCAGCAGGGCTTTGTCCTAGGAA  |
| <i>OsAPX2</i>  | TGGGAAGATGCCACAAGGAGAGAT  | TCCGCAGCATATTTCTCCACCAGT |
| <i>OsRCCR1</i> | GGATCGACGATTGATTCATG      | GTCGAGGCGTTCAGAAAGAT     |
| <i>OsH36</i>   | CCTGGTGATCTGAAGGTTGT      | CATGGCAACCAGTGTAAGC      |
| <i>OsNOL</i>   | CCACGAAAGGTATAGGATATG     | TCAAGTCAGTCACCGCAGAT     |
| <i>OsNYC1</i>  | TTTGAGCGGTTCTTCTCAGA      | CCTTTCACAACCTCGCATCCT    |
| <i>OsNYC3</i>  | TCTATCTAGGTGCCAAAGGC      | ATTCTGGCACCTGCTGTTTC     |
| <i>OsNYC4</i>  | CGTCTATGACCAACTCATGG      | TGCGTCAGCTCTGTATTGCT     |
| <i>OsPAO</i>   | AAGCCTCCGATGTTACCGAA      | CGAGGGTTTCCAGAATTGA      |
| <i>OsSGR</i>   | GAAGCTGCCGCGGACGTACA      | GTTGCCGTCGCCGTGGAC       |
| <i>OsLhcb1</i> | CCATGTTCTCCATGTTCTGGCTTCT | TAGGCCAGGCGTTGTTGTTGA    |
| <i>OsLhcb4</i> | TACCTGCAGTTCGAGCTGGAC     | AGGCCGAACACCTCGGTGTA     |
| <i>COLD1</i>   | TCTCTGCAACCTCTTCCAG       | TGGTAGTAGGGGAGGACGAA     |
| <i>OsCtb1</i>  | GGTGTGTCAAGTCAGAGGGA      | CAACAGCAACTAGGGGAGGA     |
| <i>Osmyb4</i>  | TTCCAGATCGACGACAGCTT      | GGACTCCATGAACACTCCGA     |
| <i>OsOBF1</i>  | TGGAGCAGGAGAACACGG        | CGCTGAACCTCTCGACGA       |

---

**Table S3.** Agronomic traits in wild-type and *pls4*.

| Traits      | Plant height(cm) | Tillering numbers | Panicle length(cm) | Grains per panicle | Seed-setting rate(%) | 1000-grain weight |
|-------------|------------------|-------------------|--------------------|--------------------|----------------------|-------------------|
| WT          | 91.40±1.74       | 9.48±1.16         | 18.14±0.71         | 118.67±27.78       | 96.10±0.96           | 26.57±0.30        |
| <i>pls4</i> | 89.56±2.00       | 9.40±1.02         | 16.26±0.76         | 107.37±11.78       | 68.18±7.33**         | 18.89±0.65**      |

**Table S4.** Rice quality related traits between wild-type and *pls4*.

| Traits                     | WT         | <i>pls4</i>  |
|----------------------------|------------|--------------|
| Degree of chalkiness(%)    | 3.85±0.14  | 4.56±0.23    |
| Gel consistency (mm)       | 83.23±2.72 | 68.23±3.11** |
| Amylose content(%)         | 16.25±0.75 | 15.37±0.21   |
| Gelatinization temperature | 6          | 6            |



**Table S5.** WT-vs-*pls4* Pathway Enrichment.

| Pathway                                        | DEGs genes with<br>pathway annotation<br>(485) | All genes with<br>pathway annotation<br>(3233) | Pvalue   | Qvalue   | Pathway ID |
|------------------------------------------------|------------------------------------------------|------------------------------------------------|----------|----------|------------|
| Glutathione metabolism                         | 24 (4.95%)                                     | 62 (1.92%)                                     | 0.000004 | 0.000416 | ko00480    |
| Fatty acid elongation                          | 10 (2.06%)                                     | 20 (0.62%)                                     | 0.000236 | 0.007865 | ko00062    |
| Carbon fixation in<br>photosynthetic organisms | 21 (4.33%)                                     | 64 (1.98%)                                     | 0.000244 | 0.007865 | ko00710    |
| alpha-Linolenic acid<br>metabolism             | 14 (2.89%)                                     | 35 (1.08%)                                     | 0.000269 | 0.007865 | ko00592    |
| Phenylpropanoid<br>biosynthesis                | 31 (6.39%)                                     | 118 (3.65%)                                    | 0.000842 | 0.019695 | ko00940    |
| Diterpenoid biosynthesis                       | 10 (2.06%)                                     | 25 (0.77%)                                     | 0.002052 | 0.040019 | ko00904    |
| Metabolic pathways                             | 13 (2.68%)                                     | 41 (1.27%)                                     | 0.005178 | 0.086554 | ko01100    |
| Phenylalanine<br>metabolism                    | 10 (2.06%)                                     | 30 (0.93%)                                     | 0.009344 | 0.136658 | ko00360    |
| Porphyrin and<br>chlorophyll metabolism        | 10 (2.06%)                                     | 31 (0.96%)                                     | 0.011995 | 0.155934 | ko00860    |
| Nitrogen metabolism                            | 8 (1.65%)                                      | 23 (0.71%)                                     | 0.014879 | 0.174081 | ko00910    |
| Zeatin biosynthesis                            | 6 (1.24%)                                      | 15 (0.46%)                                     | 0.016582 | 0.176367 | ko00908    |
| MAPK signaling pathway<br>- plant              | 20 (4.12%)                                     | 84 (2.6%)                                      | 0.020668 | 0.20151  | ko04016    |
| Biosynthesis of<br>secondary metabolites       | 6 (1.24%)                                      | 16 (0.49%)                                     | 0.02325  | 0.20925  | ko01110    |
| Tryptophan metabolism                          | 9 (1.86%)                                      | 30 (0.93%)                                     | 0.027181 | 0.22695  | ko00380    |
| DNA replication                                | 11 (2.27%)                                     | 40 (1.24%)                                     | 0.029096 | 0.22695  | ko03030    |
| Plant-pathogen<br>interaction                  | 24 (4.95%)                                     | 110 (3.4%)                                     | 0.03302  | 0.229828 | ko04626    |
| Mismatch repair                                | 9 (1.86%)                                      | 31 (0.96%)                                     | 0.033394 | 0.229828 | ko03430    |
| Cysteine and methionine<br>metabolism          | 18 (3.71%)                                     | 78 (2.41%)                                     | 0.036577 | 0.237751 | ko00270    |
| Fatty acid degradation                         | 10 (2.06%)                                     | 37 (1.14%)                                     | 0.040978 | 0.248564 | ko00071    |
| Glycolysis /<br>Gluconeogenesis                | 23 (4.74%)                                     | 107 (3.31%)                                    | 0.04249  | 0.248564 | ko00010    |
| Ascorbate and aldarate<br>metabolism           | 10 (2.06%)                                     | 38 (1.18%)                                     | 0.048459 | 0.269987 | ko00053    |
| Flavonoid biosynthesis                         | 6 (1.24%)                                      | 19 (0.59%)                                     | 0.053186 | 0.273055 | ko00941    |

**Table S6.** Senescence-related genes identified by RNA-seq analysis are agreement with the expression patterns of RT-qPCR.

| Locus          | Annotation                                                  | Fold change |
|----------------|-------------------------------------------------------------|-------------|
| Up-regulation  |                                                             |             |
| LOC_Os01g12710 | Chlorophyll b reductase, Leaf senescence                    | 0.4375      |
| LOC_Os06g24730 | Chlorophyll degradation during senescence                   | 0.7291      |
| LOC_Os03g05310 | Pheophorbide a oxygenase, Leaf senescence                   | 1.0768      |
| LOC_Os10g25030 | Red chlorophyll catabolite reductase, Leaf senescence       | 2.1437      |
| LOC_Os06g51150 | Catalase isozyme B                                          | 0.5323      |
| LOC_Os03g17690 | Similar to L-ascorbate peroxidase                           | 0.8026      |
| LOC_Os07g49400 | L-ascorbate peroxidase                                      | 0.7896      |
| LOC_Os05g39770 | Similar to Alanine:glyoxylate aminotransferase-like protein | 2.5450      |
